# Supplementary material
Source: publisher site journal article supplement (https://www.dovepress.com/article/217795)
Supplement: Supplementary file 1 [file get_supplementary_file.php]

**Supplementary material**

**
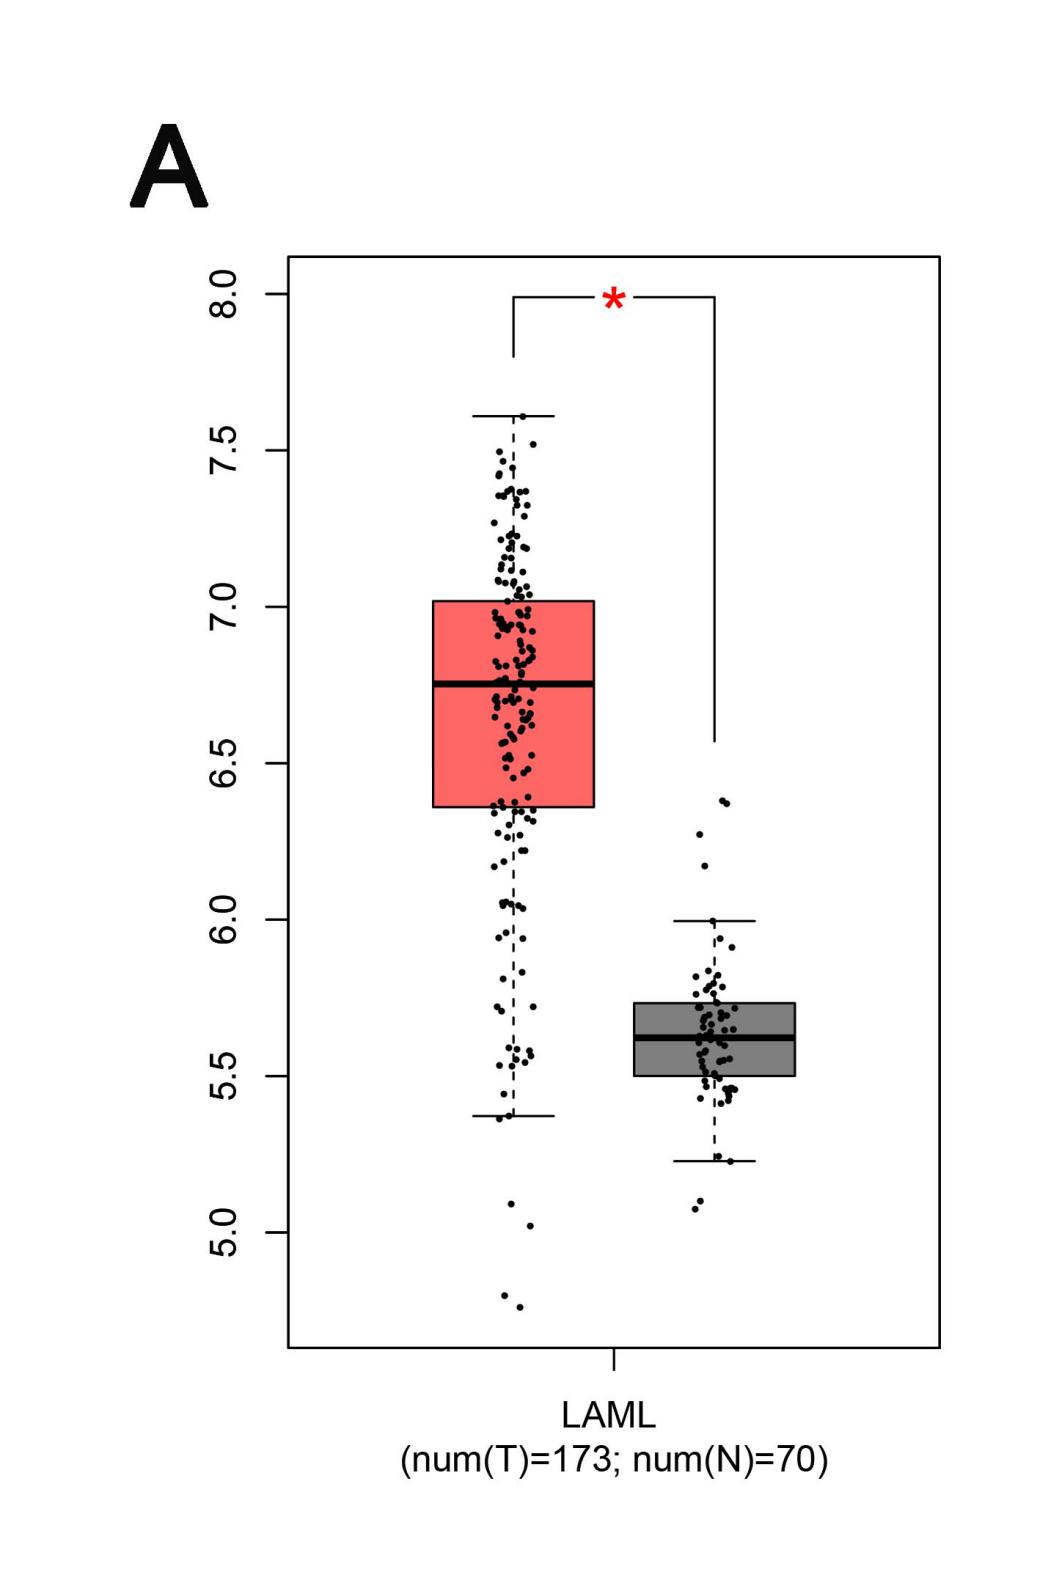
**

**Supplementary Figure 1. The expression of TUG1 in AML and normal bone marrow tissues of TCGA data was analyzed by Gepia database.**

Compared with normal bone marrow cells, the expression levels of TUG1 in AML cells were significantly up-regulated,

**
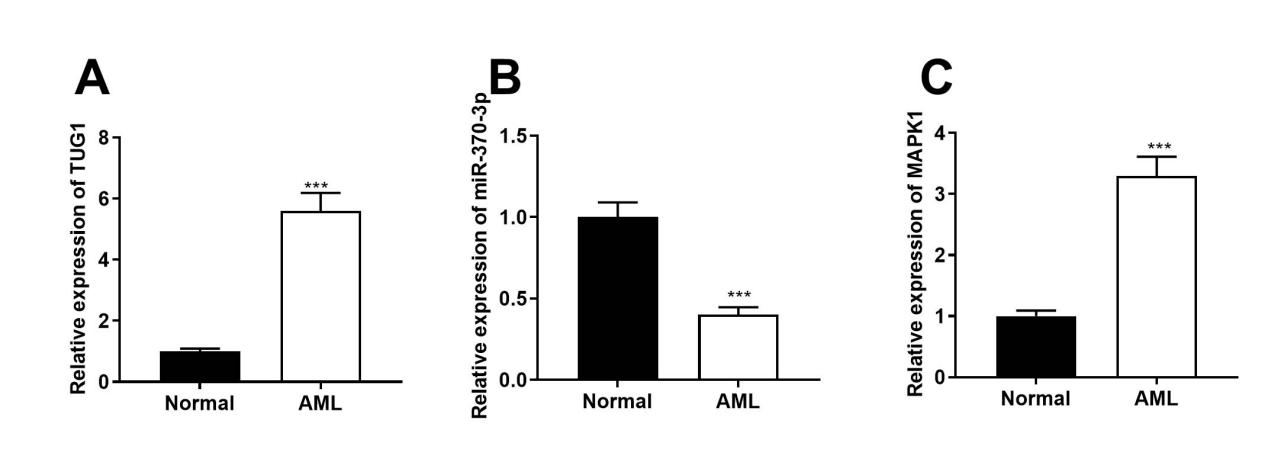
**

**Supplementary Figure 2. The expression of TUG1, MiR-370-3p and MAPK1 in AML cells.**

The expression of TUG1, MiR-370-3p and MAPK1 in AML cells was detected by qRT-PCR. Compared with normal bone marrow cells, the expression levels of TUG1 and MAPK1 in AML cells were significantly up-regulated, while the expression levels of miR-370-3p were significantly down-regulated.
